# Supplementary material for: Lipoprotein signatures of cholesteryl ester transfer protein and HMG-CoA reductase inhibition
Source: PubMed Central journal article supplement (PMC6944381; doi:10.1371/journal.pbio.3000572), 2019-12-20
Supplement: pbio.3000572.s002.pdf [file pbio.3000572.s002.pdf]

| <b>Clinical characteristics</b> | <b>FINRISK97</b> | <b>DILGOM</b>   | <b>YFS</b>     | <b>NFBC66</b>  | <b>NFBC86</b>  | <b>INTERVAL</b> | <b>SABRE</b>   |
|---------------------------------|------------------|-----------------|----------------|----------------|----------------|-----------------|----------------|
| Number of participants          | 6,942            | 4,124           | 1,948          | 4,702          | 3,726          | 40,958          | 4,976          |
| Age (years $\pm$ s.d.)          | 47.5 $\pm$ 13.2  | 52.1 $\pm$ 13.6 | 37.7 $\pm$ 5.0 | 31.0 $\pm$ 0.3 | 16 $\pm$ 0.4   | 43.5 $\pm$ 14.3 | 52.4 $\pm$ 7.0 |
| Female (%)                      | 50               | 53              | 53             | 54             | 48             | 51              | 22             |
| BMI $\pm$ s.d.                  | 26.7 $\pm$ 4.5   | 26.5 $\pm$ 4.6  | 26.0 $\pm$ 4.7 | 24.6 $\pm$ 4.2 | 21.3 $\pm$ 3.6 | 26.4 $\pm$ 4.6  | 26.4 $\pm$ 4.0 |
| Total cholesterol (mmol/l)      | 5.0 $\pm$ 1.0    | 4.3 $\pm$ 0.9   | 5.0 $\pm$ 1.0  | 5.3 $\pm$ 1.2  | 4.4 $\pm$ 0.9  | 4.2 $\pm$ 1.0   | 5.9 $\pm$ 1.1  |
| HDL cholesterol (mmol/l)        | 1.6 $\pm$ 0.3    | 1.5 $\pm$ 0.4   | 1.6 $\pm$ 0.3  | 1.7 $\pm$ 0.4  | 1.5 $\pm$ 0.3  | 1.4 $\pm$ 0.4   | 1.4 $\pm$ 0.4  |
| Triglycerides (mmol/l)          | 0.9 $\pm$ 0.6    | 1.1 $\pm$ 0.6   | 1.3 $\pm$ 0.7  | 1.2 $\pm$ 0.7  | 0.9 $\pm$ 0.5  | 1.2 $\pm$ 0.5   | 1.7 $\pm$ 1.3  |
