# Supplementary material for: Lipoprotein signatures of cholesteryl ester transfer protein and HMG-CoA reductase inhibition
Source: PubMed Central journal article supplement (PMC6944381; doi:10.1371/journal.pbio.3000572), 2019-12-20
Supplement: pbio.3000572.s003.pdf [file pbio.3000572.s003.pdf]

| Study               | Short name                             | FINRISK97                                                                               | DILGOM                                                                                  | YFS                                                                                     | NFBC66                                                                                  | NFBC86                                                                                                  | INTERVAL                                                                                                                    |
|---------------------|----------------------------------------|-----------------------------------------------------------------------------------------|-----------------------------------------------------------------------------------------|-----------------------------------------------------------------------------------------|-----------------------------------------------------------------------------------------|---------------------------------------------------------------------------------------------------------|-----------------------------------------------------------------------------------------------------------------------------|
|                     | <b>Full name</b>                       | FINRISK97                                                                               | Dietary, Lifestyle, and Genetic determinants of Obesity and Metabolic syndrome          | The Cardiovascular Risk in Young Finns Study                                            | Northern Finland Birth Cohort Study 1966                                                | Northern Finland Birth Cohort Study 1986                                                                | INTERVAL                                                                                                                    |
| <b>Study design</b> |                                        | Population-based cohort                                                                 | Population-based cohort                                                                 | Follow up study in children                                                             | Birth cohort                                                                            | Birth cohort                                                                                            | Follow up study in blood donors                                                                                             |
| <b>Ethnicity</b>    |                                        | Finnish                                                                                 | Finnish                                                                                 | Finnish                                                                                 | Finnish                                                                                 | Finnish                                                                                                 | European ancestries                                                                                                         |
| <b>Sample QC</b>    | <b>Call rate</b>                       | ≥ 95%                                                                                   | ≥ 95%                                                                                   | ≥ 95%                                                                                   | ≥ 95%                                                                                   | ≥ 95%                                                                                                   | ≥ 95%                                                                                                                       |
|                     | <b>Other exclusions</b>                | IBD > 0.1, sex mismatches, duplicates, heterozygosity outliers by eye from distribution | IBD > 0.1, sex mismatches, duplicates, heterozygosity outliers by eye from distribution | IBD > 0.1, sex mismatches, duplicates, heterozygosity outliers by eye from distribution | IBD > 0.2, sex mismatches, duplicates, heterozygosity outliers by eye from distribution | IBD pairwise sharing > 0.20; sex mismatch, duplicates, heterozygosity outliers by eye from distribution | Sex mismatches, duplicates, contaminated samples, heterozygosity outliers (>3SD from the mean), non-European samples by PCA |
| <b>Genotyping</b>   | <b>Array used</b>                      | Several platforms †                                                                     | Several platforms †                                                                     | Illumina 670k                                                                           | Illumina 370k                                                                           | Illumina HumanOmniExpressExome                                                                          | Affymetrix UK Biobank Axiom                                                                                                 |
|                     | <b>Genotype calling algorithm</b>      | Illuminus                                                                               | Illuminus                                                                               | Illuminus                                                                               | Illuminus                                                                               | Genomestudio                                                                                            | Affymetrix Axiom GT1                                                                                                        |
|                     | <b>MAF; p for HWE; Info (rs247617)</b> | 0.28; 0.06; 0.99                                                                        | 0.28; 0.06; 0.99                                                                        | 0.27; 0.96; 1                                                                           | 0.28; 0.50; 1                                                                           | 0.27; 0.34; 1                                                                                           | 0.32; 0.41; 1.0                                                                                                             |
|                     | <b>MAF; p for HWE; Info (rs12916)</b>  | 0.46; 0.56; 0.99                                                                        | 0.46; 0.56; 0.99                                                                        | 0.45; 0.33; 1                                                                           | 0.44; 0.91; 1                                                                           | 0.43; 0.3; 1                                                                                            | 0.40; 0.68; 0.99                                                                                                            |
|                     | <b>Imputation software and panel</b>   | IMPUTE2, 1000 genomes phase 1v3                                                         | IMPUTE2, 1000 genomes phase 1v3                                                         | HRC imputation pipeline                                                                 | HRC imputation pipeline                                                                 | HRC imputation pipeline                                                                                 | Sanger imputation server (SHAPEIT3, PBWT), 1000G Phase3 & UK10K                                                             |
|                     | <b>Analysis software</b>               | SNPTEST 2.5.1                                                                           | SNPTEST 2.5.1                                                                           | SNPTEST 2.5.1                                                                           | SNPTEST 2.5.1                                                                           | SNPTEST 2.5.1                                                                                           | BOLT-LMM 2.2                                                                                                                |

† Please see cohort descriptions for different genotyping batches.
