# Supplementary material for: Lipoprotein signatures of cholesteryl ester transfer protein and HMG-CoA reductase inhibition
Source: PubMed Central journal article supplement (PMC6944381; doi:10.1371/journal.pbio.3000572), 2019-12-20
Supplement: pbio.3000572.s004.pdf [file pbio.3000572.s004.pdf]

| <b>Trait abbreviation</b> | <b>Trait description</b> |
|---------------------------|--------------------------|
|---------------------------|--------------------------|

### **LIPOPROTEIN SUBCLASSES**

|                 |                                                                                                                         |
|-----------------|-------------------------------------------------------------------------------------------------------------------------|
| <b>XXL-VLDL</b> | Chylomicrons and extremely large very-low-density lipoprotein (VLDL) particles (average particle diameter $\geq 75$ nm) |
| <b>XL-VLDL</b>  | Very large VLDL particles (64 nm)                                                                                       |
| <b>L-VLDL</b>   | Large VLDL particles (53.6 nm)                                                                                          |
| <b>M-VLDL</b>   | Medium VLDL particles (44.5 nm)                                                                                         |
| <b>S-VLDL</b>   | Small VLDL particles (36.8 nm)                                                                                          |
| <b>XS-VLDL</b>  | Very small VLDL particles (31.3 nm)                                                                                     |
| <b>IDL</b>      | Intermediate-density lipoprotein particles (28.6 nm)                                                                    |
| <b>L-LDL</b>    | Large low-density lipoprotein (LDL) particles (25.5 nm)                                                                 |
| <b>M-LDL</b>    | Medium (LDL) particles (23.0 nm)                                                                                        |
| <b>S-LDL</b>    | Small (LDL) particles (18.7 nm)                                                                                         |
| <b>XL-HDL</b>   | Very large high-density lipoprotein (HDL) particles (14.3 nm)                                                           |
| <b>L-HDL</b>    | Large (HDL) particles (12.1 nm)                                                                                         |
| <b>M-HDL</b>    | Medium (HDL) particles (10.9 nm)                                                                                        |
| <b>S-HDL</b>    | Small (HDL) particles (8.7 nm)                                                                                          |

### **CONCENTRATIONS OF CIRCULATING LIPIDS**

|           |                                |
|-----------|--------------------------------|
| <b>P</b>  | Particle concentration (mol/l) |
| <b>L</b>  | Total lipids (mmol/l)          |
| <b>PL</b> | Phospholipids (mmol/l)         |
| <b>C</b>  | Total cholesterol (mmol/l)     |
| <b>CE</b> | Cholesterol esters (mmol/l)    |
| <b>FC</b> | Free cholesterol (mmol/l)      |
| <b>TG</b> | Triglycerides (mmol/l)         |

### **LIPOPROTEIN COMPOSITION MEASURES**

|            |                                              |
|------------|----------------------------------------------|
| <b>PL%</b> | Phospholipids to total lipids ratio (%)      |
| <b>C%</b>  | Total cholesterol to total lipids ratio (%)  |
| <b>CE%</b> | Cholesterol esters to total lipids ratio (%) |
| <b>FC%</b> | Free cholesterol to total lipids ratio (%)   |
| <b>TG%</b> | Triglycerides to total lipids ratio (%)      |

### **AVERAGE PARTICLE DIAMETER**

|               |                                       |
|---------------|---------------------------------------|
| <b>VLDL-D</b> | Mean diameter for VLDL particles (nm) |
|---------------|---------------------------------------|

|                                               |                                                             |
|-----------------------------------------------|-------------------------------------------------------------|
| <b>LDL-D</b>                                  | Mean diameter for LDL particles (nm)                        |
| <b>HDL-D</b>                                  | Mean diameter for HDL particles (nm)                        |
| <b>TOTAL CIRCULATING LIPID CONCENTRATIONS</b> |                                                             |
| <b>Serum-C</b>                                | Serum total cholesterol (mmol/l)                            |
| <b>VLDL-C</b>                                 | Total cholesterol in VLDL particles (mmol/l)                |
| <b>Remnant-C</b>                              | Remnant cholesterol (non-HDL, non-LDL cholesterol) (mmol/l) |
| <b>LDL-C</b>                                  | Total cholesterol in LDL particles (mmol/l)                 |
| <b>HDL-C</b>                                  | Total cholesterol in HDL particles (mmol/l)                 |
| <b>HDL2-C</b>                                 | Total cholesterol in HDL2 particles (mmol/l)                |
| <b>HDL3-C</b>                                 | Total cholesterol in HDL3 particles (mmol/l)                |
| <b>EstC</b>                                   | Esterified cholesterol (mmol/l)                             |
| <b>FreeC</b>                                  | Free cholesterol (mmol/l)                                   |
| <b>Serum-TG</b>                               | Serum total triglycerides (mmol/l)                          |
| <b>VLDL-TG</b>                                | Triglycerides in VLDL particles (mmol/l)                    |
| <b>LDL-TG</b>                                 | Triglycerides in LDL particles (mmol/l)                     |
| <b>HDL-TG</b>                                 | Triglycerides in HDL particles (mmol/l)                     |
| <b>TotPG</b>                                  | Total phosphoglycerides (mmol/l)                            |
| <b>TG/PG</b>                                  | Ratio of triglycerides to phosphoglycerides                 |
| <b>PC</b>                                     | Phosphatidylcholine and other cholines (mmol/l)             |
| <b>SM</b>                                     | Sphingomyelins (mmol/l)                                     |
| <b>TotCho</b>                                 | Total cholines (mmol/l)                                     |
| <b>APOLIPOPROTEIN CONCENTRATIONS</b>          |                                                             |
| <b>ApoA-I</b>                                 | Apolipoprotein A-I (g/l)                                    |
| <b>ApoB</b>                                   | Apolipoprotein B (g/l)                                      |
